# Supplementary material
Source: PubMed Central journal article supplement (PMC8497398)
Supplement: NIHMS1716106-supplement-supinfo.pdf [file NIHMS1716106-supplement-supinfo.pdf]

## Supplementary Tables

### Supplementary Table S1: HFrEF Identification

**Step 1:** Classification based on index admission diagnosis codes whenever possible:

| ICD-9                                                                                                                               | ICD-10                                                                                                                          |
|-------------------------------------------------------------------------------------------------------------------------------------|---------------------------------------------------------------------------------------------------------------------------------|
| Automatically <i>include</i> HFrEF cohort if the primary/secondary diagnosis code is the following:<br><b>1) 428.2x, 428.4x</b>     | Automatically <i>include</i> HFrEF cohort if the primary/secondary diagnosis code is the following:<br><b>1) I50.2x, I50.4x</b> |
| Automatically <i>exclude</i> HFpEF cohort if the primary/secondary diagnosis code is the following:<br><b>2) 428.3x</b>             | Automatically <i>exclude</i> HFpEF cohort if the primary/secondary diagnosis code is the following:<br><b>2) I50.3x</b>         |
| If the primary or secondary diagnosis code is for undifferentiated HF, apply the *algorithm below:<br><b>3) 428.0, 428.1, 428.9</b> | If the primary secondary dx code is for undifferentiated HF, apply the **algorithm below:<br><b>3) I50.1, I50.9</b>             |

**Step 2:** If primary or secondary diagnosis code from the index admission is for undifferentiated HF apply the following algorithms:

\*Algorithm to Differentiate HFrEF from HFpEF (ICD-9)

Look back 1 year at all claims (inpatient and outpatient, in any position) for HF (428.x)

1. If they have  $\geq 1$  code for HFrEF (428.2x, 428.4x) and no codes for HFpEF (428.3x)  $\rightarrow$  include as a HFrEF admission
2. If they have  $\geq 1$  code for HFpEF (428.3x) and no codes for HFrEF (428.2x, 428.4x)  $\rightarrow$  exclude as a HFpEF admission
3. If they have  $\geq 1$  code for HFrEF (428.2x, 428.4x) and  $\geq 1$  code HFpEF (428.3x)  $\rightarrow$  include them as a HFrEF admission the number of HFrEF codes is greater than the number of HFpEF codes but if the number of HFpEF codes is greater than the number of HFrEF codes, exclude them as a HFpEF admission
4. If they have no codes for either HFrEF (428.2x, 428.4x) or HFpEF (428.3x) and only have codes for “undetermined HF” (428.0, 428.1, 428.9) in the year prior to the index admission  $\rightarrow$  exclude them because their HF type cannot be determined

\*\*Algorithm to Differentiate HFrEF from HFpEF (ICD-10)

Look back 1 year at all claims (inpatient and outpatient, in any position) for HF (I50.x)

1. If they have  $\geq 1$  code for HFrEF (I50.2x, I50.4x) and no codes for HFpEF (I50.3x)  $\rightarrow$  include as a HFrEF admission
2. If they have  $\geq 1$  code for HFpEF (I50.3x) and no codes for HFrEF (I50.2x, I50.4x)  $\rightarrow$  include as a HFrEF admission
3. If they have  $\geq 1$  code for HFrEF (I50.2x, I50.4x) and  $\geq 1$  code HFpEF (I50.3x)  $\rightarrow$  include them as a HFrEF admission the number of HFrEF codes is greater than the number of HFpEF codes but if the number of HFpEF codes is greater than the number of HFrEF codes, exclude them as a HFpEF admission
4. If they have no codes for either HFrEF (I50.2x, I50.4x) or HFpEF (I50.3x) and only have codes for “undetermined HF” (I50.1, I50.9)  $\rightarrow$  exclude them because their HF type cannot be determined

**Supplementary Table S2: Pre/Post Weighting for Short- and Long-Term Analyses**

**Pre/Post Weighting for Short-Term Analysis**

| Variables                            | Unweighted   |              |                         |                | Weighted     |              |                         |                |
|--------------------------------------|--------------|--------------|-------------------------|----------------|--------------|--------------|-------------------------|----------------|
|                                      | No 30d Fill  | 30d Fill     | Standardized Difference | Variance Ratio | No 30d Fill  | 30d Fill     | Standardized Difference | Variance Ratio |
|                                      | Mean/Percent | Mean/Percent |                         |                | Mean/Percent | Mean/Percent |                         |                |
| <b>Demographic Characteristics</b>   |              |              |                         |                |              |              |                         |                |
| Age 66-74                            | 24.82        | 31.79        | -0.16                   | 0.86           | 25.37        | 29.42        | -0.09                   | 0.91           |
| Age 75-84                            | 38.01        | 39.56        | -0.03                   | 0.99           | 38.28        | 39.38        | -0.02                   | 0.99           |
| Age 85+                              | 37.17        | 28.65        | 0.18                    | 1.14           | 36.35        | 31.21        | 0.11                    | 1.08           |
| Female                               | 54.38        | 52.80        | 0.03                    | 1.00           | 54.12        | 52.71        | 0.03                    | 1.00           |
| <b>Race/Ethnicity</b>                |              |              |                         |                |              |              |                         |                |
| Black                                | 8.34         | 9.97         | -0.06                   | 0.85           | 8.41         | 9.23         | -0.03                   | 0.92           |
| White                                | 84.61        | 81.43        | 0.08                    | 0.86           | 84.51        | 82.91        | 0.04                    | 0.92           |
| Hispanic                             | 4.55         | 5.64         | -0.05                   | 0.81           | 4.59         | 5.16         | -0.03                   | 0.89           |
| <b>Socioeconomic Characteristics</b> |              |              |                         |                |              |              |                         |                |
| Dual Enrollment                      | 33.93        | 34.73        | -0.02                   | 0.99           | 33.45        | 32.81        | 0.01                    | 1.01           |
| % Bachelor's Degree*                 | 27.16        | 26.67        | -0.03                   | 1.01           | 26.97        | 26.88        | -0.01                   | 1.12           |
| % below Federal Poverty Line*        | 15.49        | 16.03        | 0.06                    | 0.94           | 15.71        | 15.79        | 0.01                    | 1.08           |
| <b>Geography</b>                     |              |              |                         |                |              |              |                         |                |
| Midwest                              | 25.98        | 26.45        | -0.01                   | 0.99           | 26.02        | 26.33        | -0.01                   | 0.99           |
| Northeast                            | 21.47        | 20.93        | 0.01                    | 1.02           | 21.42        | 21.10        | 0.01                    | 1.01           |
| South                                | 39.53        | 39.50        | 0.00                    | 1.00           | 39.55        | 39.41        | 0.00                    | 1.00           |
| West                                 | 13.02        | 13.12        | 0.00                    | 0.99           | 13.02        | 13.16        | 0.00                    | 0.99           |
| <b>Medical Comorbidities</b>         |              |              |                         |                |              |              |                         |                |
| Valvular heart disease               | 23.39        | 20.85        | 0.06                    | 1.09           | 23.30        | 22.00        | 0.03                    | 1.04           |
| Pulmonary circulatory disease        | 8.18         | 6.27         | 0.07                    | 1.28           | 8.01         | 6.97         | 0.04                    | 1.14           |
| Peripheral vascular disease          | 26.04        | 22.82        | 0.07                    | 1.09           | 25.68        | 23.73        | 0.05                    | 1.05           |
| Hypertension                         | 83.04        | 81.43        | 0.04                    | 0.93           | 82.90        | 81.98        | 0.02                    | 0.96           |
| Paralysis                            | 3.09         | 2.44         | 0.04                    | 1.26           | 3.00         | 2.52         | 0.03                    | 1.18           |
| Neurodegenerative disorder           | 14.37        | 10.62        | 0.11                    | 1.30           | 14.02        | 11.49        | 0.08                    | 1.19           |
| Chronic lung disease                 | 34.45        | 29.71        | 0.10                    | 1.08           | 34.00        | 31.19        | 0.06                    | 1.05           |
| Diabetes                             | 26.46        | 27.77        | -0.03                   | 0.97           | 26.39        | 27.21        | -0.02                   | 0.98           |
| Complicated Diabetes                 | 17.50        | 16.59        | 0.02                    | 1.04           | 17.30        | 16.79        | 0.01                    | 1.02           |
| Hypothyroidism                       | 22.41        | 19.24        | 0.08                    | 1.12           | 22.20        | 20.32        | 0.05                    | 1.07           |
| Renal failure                        | 27.62        | 25.37        | 0.05                    | 1.06           | 27.56        | 26.24        | 0.03                    | 1.03           |
| Liver disease                        | 1.55         | 1.30         | 0.02                    | 1.18           | 1.55         | 1.40         | 0.01                    | 1.10           |
| Lymphoma                             | 1.60         | 1.66         | -0.01                   | 0.96           | 1.62         | 1.68         | 0.00                    | 0.96           |
| Metastatic cancer                    | 1.66         | 1.53         | 0.01                    | 1.08           | 1.67         | 1.65         | 0.00                    | 1.01           |
| Solid tumor without metastasis       | 9.12         | 8.75         | 0.01                    | 1.04           | 9.15         | 8.95         | 0.01                    | 1.02           |

|                                                    |       |       |       |      |       |       |       |      |
|----------------------------------------------------|-------|-------|-------|------|-------|-------|-------|------|
| Coagulopathy                                       | 7.83  | 6.65  | 0.05  | 1.16 | 7.79  | 7.12  | 0.03  | 1.09 |
| Obesity                                            | 8.83  | 8.30  | 0.02  | 1.06 | 8.66  | 8.36  | 0.01  | 1.03 |
| Weight Loss                                        | 7.15  | 5.59  | 0.06  | 1.26 | 7.06  | 6.05  | 0.04  | 1.15 |
| Fluid and electrolyte disorder                     | 29.10 | 24.74 | 0.10  | 1.11 | 28.73 | 25.87 | 0.06  | 1.07 |
| Blood loss anemia                                  | 2.85  | 2.30  | 0.03  | 1.23 | 2.81  | 2.50  | 0.02  | 1.12 |
| Anemia                                             | 36.35 | 31.87 | 0.09  | 1.07 | 36.05 | 33.31 | 0.06  | 1.04 |
| Psychiatric Disease                                | 6.14  | 4.92  | 0.05  | 1.23 | 6.01  | 5.11  | 0.04  | 1.17 |
| Depression                                         | 12.48 | 10.42 | 0.06  | 1.17 | 12.30 | 10.86 | 0.04  | 1.11 |
| Implanted cardiac defibrillator                    | 13.54 | 13.18 | 0.01  | 1.02 | 13.70 | 13.71 | 0.00  | 1.00 |
| Frailty Score                                      | 0.22  | 0.21  | -0.22 | 1.09 | 0.21  | 0.21  | -0.03 | 1.04 |
| <b>Index Admission Comorbidities</b>               |       |       |       |      |       |       |       |      |
| Bradycardia                                        | 5.25  | 5.24  | 0.00  | 1.00 | 5.34  | 5.46  | -0.01 | 0.98 |
| Acute Kidney Injury                                | 19.73 | 19.34 | 0.01  | 1.02 | 19.71 | 19.49 | 0.01  | 1.01 |
| Hypotension                                        | 7.20  | 6.93  | 0.01  | 1.04 | 7.21  | 7.03  | 0.01  | 1.02 |
| <b>Drug Use Prior to Admission (90d)</b>           |       |       |       |      |       |       |       |      |
| 0 PDC                                              | 57.35 | 38.16 | 0.39  | 1.04 | 54.79 | 46.31 | 0.17  | 1.00 |
| 1-80 PDC                                           | 33.87 | 41.74 | -0.16 | 0.92 | 35.07 | 38.96 | -0.08 | 0.96 |
| 80+ PDC                                            | 8.79  | 20.10 | -0.33 | 0.50 | 10.14 | 14.73 | -0.14 | 0.73 |
| Total number of Drugs at Discharge                 | 3.90  | 7.38  | 1.17  | 2.10 | 5.68  | 6.32  | 0.20  | 1.95 |
| Hospitalizations in Year Prior                     | 1.15  | 0.99  | -0.11 | 1.15 | 1.07  | 1.05  | -0.01 | 1.12 |
| Days Inpatient or in Post-Acute Care in Year Prior | 8.83  | 5.74  | -0.12 | 1.54 | 7.03  | 6.22  | -0.03 | 1.36 |

\* ZCTA-level characteristics derived from linking beneficiary zip codes with US Census Data

### Pre/Post Weighting Long-Term Analysis

| Variable                             | Unweighted |           |          |         | Weighted |           |          |         |
|--------------------------------------|------------|-----------|----------|---------|----------|-----------|----------|---------|
|                                      | PDC 0%     | PDC 1-80% | PDC 80+% | P-Value | PDC 0%   | PDC 1-80% | PDC 80+% | P-Value |
| <b>Demographic Characteristics</b>   |            |           |          |         |          |           |          |         |
| 66-74                                | 21.56      | 30.55     | 31.02    | <0.001  | 26.92    | 28.06     | 27.96    | <0.001  |
| 75-84                                | 36.54      | 39.61     | 39.64    | <0.001  | 38.80    | 38.76     | 38.94    | 0.670   |
| 85+                                  | 41.90      | 29.85     | 29.34    | <0.001  | 34.28    | 33.18     | 33.10    | <0.001  |
| Female                               | 0.56       | 0.52      | 0.53     | <0.001  | 0.54     | 0.54      | 0.54     | 0.066   |
| <b>Race/Ethnicity</b>                |            |           |          |         |          |           |          |         |
| White                                | 0.85       | 0.81      | 0.84     | <0.001  | 0.84     | 0.83      | 0.83     | 0.001   |
| Black                                | 0.08       | 0.11      | 0.09     | <0.001  | 0.09     | 0.09      | 0.09     | 0.074   |
| Hispanic                             | 0.04       | 0.06      | 0.05     | <0.001  | 0.05     | 0.05      | 0.05     | 0.058   |
| <b>Socioeconomic Characteristics</b> |            |           |          |         |          |           |          |         |
| Dual Eligibility                     | 35.43      | 34.22     | 33.58    | <0.001  | 33.58    | 34.44     | 33.75    | <0.001  |
| % Bachelor's Degree*                 | 26.83      | 26.71     | 27.20    | <0.001  | 27.12    | 26.94     | 27.09    | 0.020   |
| % below Federal Poverty Line*        | 15.71      | 16.01     | 15.54    | <0.001  | 15.65    | 15.74     | 15.63    | 0.009   |
| <b>Geography</b>                     |            |           |          |         |          |           |          |         |
| Midwest                              | 0.25       | 0.25      | 0.28     | <0.001  | 0.26     | 0.26      | 0.26     | 0.033   |
| Northeast                            | 0.21       | 0.20      | 0.22     | <0.001  | 0.21     | 0.21      | 0.21     | 0.149   |
| South                                | 0.40       | 0.41      | 0.37     | <0.001  | 0.40     | 0.40      | 0.39     | 0.027   |
| West                                 | 0.13       | 0.13      | 0.13     | <0.001  | 0.13     | 0.13      | 0.13     | 0.101   |
| <b>Medical Comorbidities</b>         |            |           |          |         |          |           |          |         |

|                                                              |       |       |       |        |       |       |       |        |
|--------------------------------------------------------------|-------|-------|-------|--------|-------|-------|-------|--------|
| Anemia                                                       | 37.36 | 34.54 | 31.38 | <0.001 | 34.83 | 34.44 | 34.34 | 0.079  |
| Blood blood anemia                                           | 3.02  | 2.58  | 2.24  | <0.001 | 2.66  | 2.62  | 2.57  | 0.498  |
| Chronic lung disease                                         | 36.76 | 32.25 | 28.53 | <0.001 | 32.51 | 32.37 | 31.90 | 0.010  |
| Coagulopathy                                                 | 7.87  | 7.45  | 6.59  | <0.001 | 7.46  | 7.31  | 7.33  | 0.429  |
| Depression                                                   | 12.91 | 11.52 | 10.34 | <0.001 | 11.83 | 11.58 | 11.61 | 0.211  |
| Diabetes                                                     | 25.32 | 27.56 | 27.99 | <0.001 | 26.48 | 27.13 | 27.11 | 0.002  |
| Complicated Diabetes                                         | 16.31 | 18.09 | 16.63 | <0.001 | 17.05 | 17.12 | 17.20 | 0.681  |
| Hypertension                                                 | 81.50 | 83.19 | 81.92 | <0.001 | 82.12 | 82.42 | 82.63 | 0.016  |
| Hypothyroidism                                               | 22.87 | 20.67 | 19.53 | <0.001 | 21.25 | 21.00 | 21.06 | 0.409  |
| Implanted cardiac defibrillator                              | 9.93  | 15.17 | 14.21 | <0.001 | 12.36 | 13.35 | 13.27 | <0.001 |
| Liver disease                                                | 1.65  | 1.51  | 1.17  | <0.001 | 1.49  | 1.44  | 1.41  | 0.455  |
| Lymphoma                                                     | 1.69  | 1.60  | 1.61  | <0.001 | 1.75  | 1.64  | 1.66  | 0.170  |
| Fluid and electrolyte disorder                               | 30.42 | 27.01 | 24.31 | <0.001 | 27.74 | 27.34 | 27.02 | 0.002  |
| Metastatic cancer                                            | 1.95  | 1.46  | 1.47  | <0.001 | 1.79  | 1.62  | 1.62  | 0.004  |
| Neurodegenerative disorder                                   | 15.99 | 11.95 | 10.49 | <0.001 | 12.96 | 12.70 | 12.34 | <0.001 |
| Obesity                                                      | 8.28  | 9.08  | 8.30  | <0.001 | 8.52  | 8.59  | 8.70  | 0.401  |
| Paralysis                                                    | 3.16  | 2.82  | 2.43  | <0.001 | 2.90  | 2.85  | 2.69  | 0.015  |
| Peripheral vascular disease                                  | 26.21 | 24.79 | 22.84 | <0.001 | 24.93 | 24.63 | 24.44 | 0.054  |
| Psychiatric disease                                          | 6.59  | 5.37  | 4.92  | <0.001 | 5.76  | 5.60  | 5.56  | 0.155  |
| Pulmonary circulatory disease                                | 8.72  | 7.21  | 6.17  | <0.001 | 7.52  | 7.35  | 7.30  | 0.171  |
| Renal failure                                                | 27.08 | 27.48 | 25.17 | <0.001 | 26.87 | 26.83 | 26.67 | 0.561  |
| Solid tumor without metastasis                               | 9.09  | 9.03  | 8.74  | 0.012  | 9.15  | 8.96  | 8.99  | 0.319  |
| Valvular heart disease                                       | 23.01 | 22.51 | 21.15 | <0.001 | 22.41 | 22.33 | 22.28 | 0.797  |
| Frailty Score                                                | 0.22  | 0.21  | 0.20  | <0.001 | 0.21  | 0.21  | 0.21  | <0.001 |
| <b>Index Admission Comorbidities</b>                         |       |       |       |        |       |       |       |        |
| Hypotension                                                  | 7.62  | 6.82  | 6.88  | <0.001 | 7.98  | 6.86  | 7.25  | <0.001 |
| Bradycardia                                                  | 5.35  | 5.02  | 5.39  | <0.001 | 5.80  | 5.07  | 5.53  | <0.001 |
| Acute Kidney Injury                                          | 20.11 | 19.56 | 19.09 | <0.001 | 20.89 | 19.59 | 19.92 | <0.001 |
| <b>Drug Use Prior to Admission (90d)</b>                     |       |       |       |        |       |       |       |        |
| 0 PDC                                                        | 76.45 | 39.81 | 34.32 | <0.001 | 53.85 | 48.01 | 48.13 | <0.001 |
| 1-79 PDC                                                     | 18.35 | 46.53 | 43.84 | <0.001 | 35.03 | 37.66 | 37.69 | <0.001 |
| 80+ PDC                                                      | 5.21  | 13.65 | 21.84 | <0.001 | 11.12 | 14.33 | 14.18 | <0.001 |
| Total number of Drugs at Discharge                           | 4.04  | 5.49  | 6.87  | <0.001 | 5.22  | 5.55  | 5.71  | <0.001 |
| Hospitalizations in Year Prior                               | 1.19  | 1.12  | 0.94  | <0.001 | 1.10  | 1.09  | 1.07  | <0.001 |
| Number of days Inpatient or in Post-Acute Care in Year Prior | 9.76  | 6.88  | 5.90  | <0.001 | 7.84  | 7.45  | 7.27  | <0.001 |

\* ZCTA-level characteristics derived from linking beneficiary zip codes with US Census Data

**Supplementary Table S3: Sensitivity Analysis for Short- and Long-Term Analyses**

**Sensitivity Analysis of Short-Term Analysis: “Target Trial” with 7-day Exposure Window and Mortality between Days 8 and 30**

| Drug Fill within 7-days of Discharge | Odds Ratio | 95% Confidence Interval | P-Value |
|--------------------------------------|------------|-------------------------|---------|
| <b>Beta Blocker Fill</b>             |            |                         |         |
| Age 66-74                            | 0.827      | 0.756, 0.904            | <0.001  |
| Age 75-84                            | 0.773      | 0.724, 0.825            | <0.001  |
| Age 85+                              | 0.769      | 0.727, 0.814            | <0.001  |
| <b>ACEi/ARB/ARNI Fill</b>            |            |                         |         |
| Age 66-74                            | 0.686      | 0.618, 0.761            | <0.001  |
| Age 75-84                            | 0.609      | 0.563, 0.658            | <0.001  |
| Age 85+                              | 0.688      | 0.645, 0.734            | <0.001  |

\* Deaths that occur during the first week are excluded

**Sensitivity Analysis of Long-Term Analysis: Among Beneficiaries that Survive to 6 months, Evaluation of Mortality between Day 180 and 360 based on PDC during the first 6 months**

| PDC during first 6 months | Hazard Ratio for death between days 180-365 after discharge | 95% Confidence Interval | P-Value |
|---------------------------|-------------------------------------------------------------|-------------------------|---------|
| <b>Beta Blocker Fill</b>  |                                                             |                         |         |
| Age 66-74                 |                                                             |                         |         |
| 1-80 PDC                  | 0.371                                                       | 0.336, 0.411            | <0.001  |
| 80+ PDC                   | 0.409                                                       | 0.377, 0.444            | <0.001  |
| Age 75-84                 |                                                             |                         |         |
| 1-80 PDC                  | 0.441                                                       | 0.409, 0.476            | <0.001  |
| 80+ PDC                   | 0.476                                                       | 0.447, 0.507            | <0.001  |
| Age 85+                   |                                                             |                         |         |
| 1-80 PDC                  | 0.489                                                       | 0.454, 0.527            | <0.001  |
| 80+ PDC                   | 0.554                                                       | 0.521, 0.589            | <0.001  |
| <b>ACEi/ARB Fill</b>      |                                                             |                         |         |
| Age 66-74                 |                                                             |                         |         |
| 1-80 PDC                  | 0.444                                                       | 0.399, 0.493            | <0.001  |
| 80+ PDC                   | 0.531                                                       | 0.486, 0.580            | <0.001  |
| Age 75-84                 |                                                             |                         |         |
| 1-80 PDC                  | 0.491                                                       | 0.453, 0.532            | <0.001  |
| 80+ PDC                   | 0.558                                                       | 0.521, 0.597            | <0.001  |
| Age 85+                   |                                                             |                         |         |
| 1-80 PDC                  | 0.548                                                       | 0.507, 0.592            | <0.001  |
| 80+ PDC                   | 0.657                                                       | 0.615, 0.701            | <0.001  |

0 PDC is the reference group

## Supplementary Table S4: E-Values for Short and Long Analyses

| Drug Fill within 30-days of Discharge | E-Value* | E-value for the Upper Limit of the Confidence Interval |
|---------------------------------------|----------|--------------------------------------------------------|
| <b>Beta Blocker Fill</b>              |          |                                                        |
| Age 66-74                             | 1.72     | 1.60                                                   |
| Age 75-84                             | 1.79     | 1.71                                                   |
| Age 85+                               | 1.94     | 1.86                                                   |
| <b>ACEi/ARB Fill</b>                  |          |                                                        |
| Age 66-74                             | 2.10     | 1.96                                                   |
| Age 75-84                             | 2.32     | 2.22                                                   |
| Age 85+                               | 2.29     | 2.20                                                   |

\* Residual confounding could explain the observed association if there exists an unmeasured covariate that has a relative risk association at least as large as the E-value with both the outcome (30-day mortality) and the exposure (receipt of neurohormonal therapy).

| Drug Use in 1 year After Discharge | E-Value* | E-value for Confidence Interval |
|------------------------------------|----------|---------------------------------|
| <b>Beta Blocker Exposure</b>       |          |                                 |
| Age 66-74                          |          |                                 |
| 1-80 PDC                           | 2.78     | 2.68                            |
| 80+ PDC                            | 3.38     | 3.26                            |
| Age 75-84                          |          |                                 |
| 1-80 PDC                           | 2.67     | 2.59                            |
| 80+ PDC                            | 3.27     | 3.18                            |
| Age 85+                            |          |                                 |
| 1-80 PDC                           | 2.35     | 2.28                            |
| 80+ PDC                            | 2.97     | 2.89                            |
| <b>ACEi/ARB Exposure</b>           |          |                                 |
| Age 66-74                          |          |                                 |
| 1-80 PDC                           | 2.95     | 2.85                            |
| 80+ PDC                            | 3.26     | 3.14                            |
| Age 75-84                          |          |                                 |
| 1-80 PDC                           | 2.84     | 2.77                            |
| 80+ PDC                            | 3.29     | 3.20                            |
| Age 85+                            |          |                                 |
| 1-80 PDC                           | 2.47     | 2.41                            |
| 80+ PDC                            | 2.85     | 2.77                            |

\* Residual confounding could explain the observed association if there exists an unmeasured covariate that has a relative risk association at least as large as the E-value with both the outcome (30-day mortality) and the exposure (receipt of neurohormonal therapy).

## Supplementary Figures

### Supplementary Figure S1: Distribution of Days to Drug fill for those Exposed to Neurohormonal Therapy after Hospital Discharge

#### Beta Blocker Fills

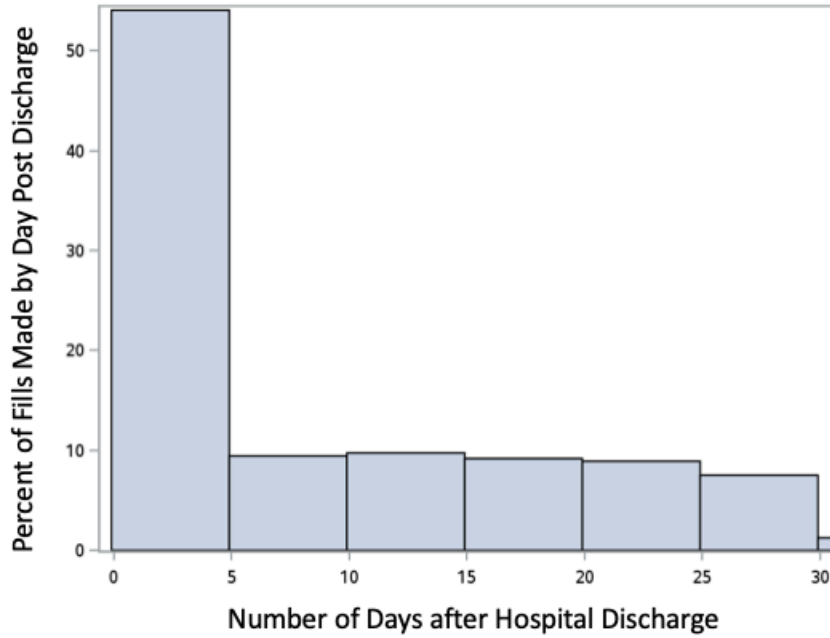

#### ACEi/ARB/ARNI Fills

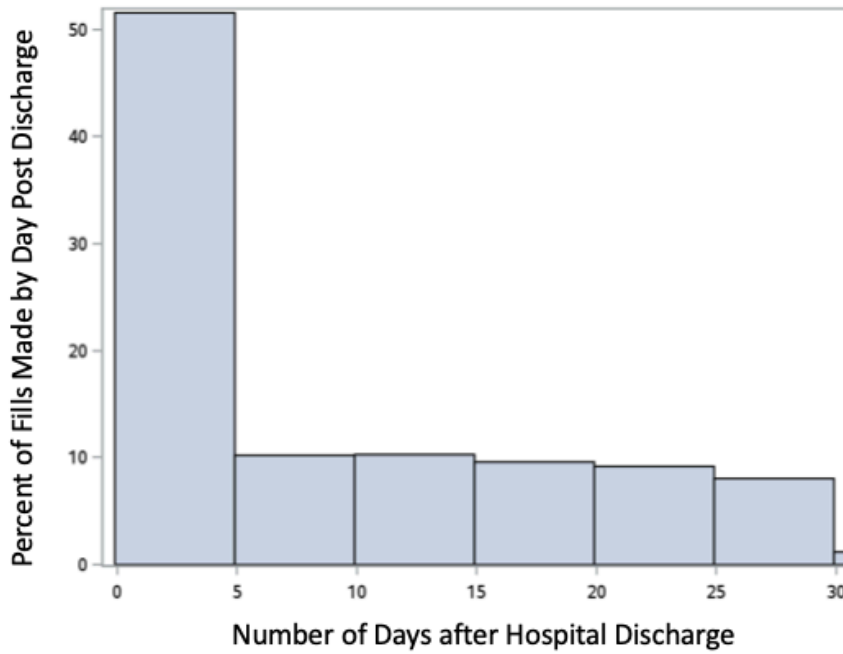

**Supplementary Figure S2: Survival Curves for Death within 1 Year after Hospital Discharge based on Beta-Blocker and ACEi/ARB/ARNI Exposure, Stratified by Age, 2008-2015**

**Beta-Blockers**

**A) Age 66-74**

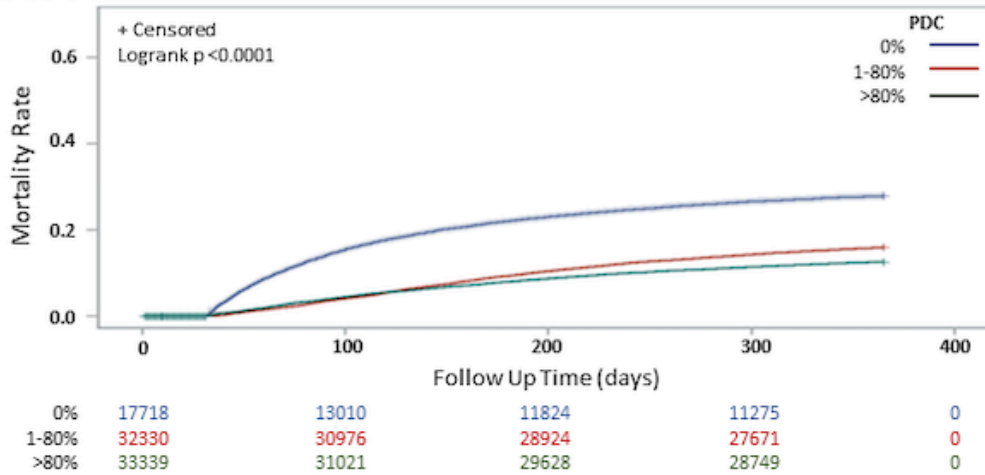

**B) Age 75-85**

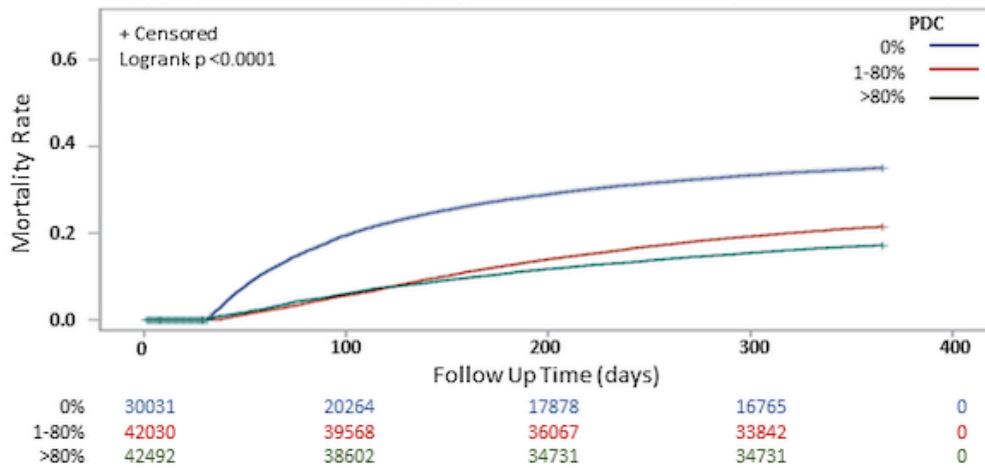

**C) Age 85+**

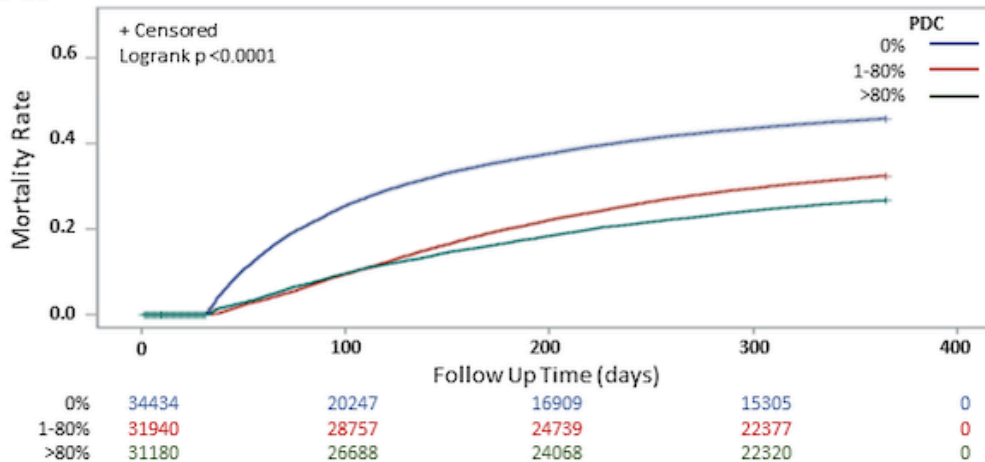

*This figure shows the survival curves for beneficiaries based on exposure to beta-blockers after admission for decompensated heart failure. (A) shows the survival curves for beneficiaries aged 66-74. (B) shows the survival curves for beneficiaries aged 75-85 and (C) shows the survival curves for beneficiaries aged 85+. In each panel, patients are stratified based on the proportion of days covered (PDC) by beta-blockers: “no exposure” 0 PDC (blue), “moderate” exposure 1-80 PDC (red) and “high exposure” 80+ PDC (green).*



## ACEi/ARB/ARNI

### A) Age 66-74

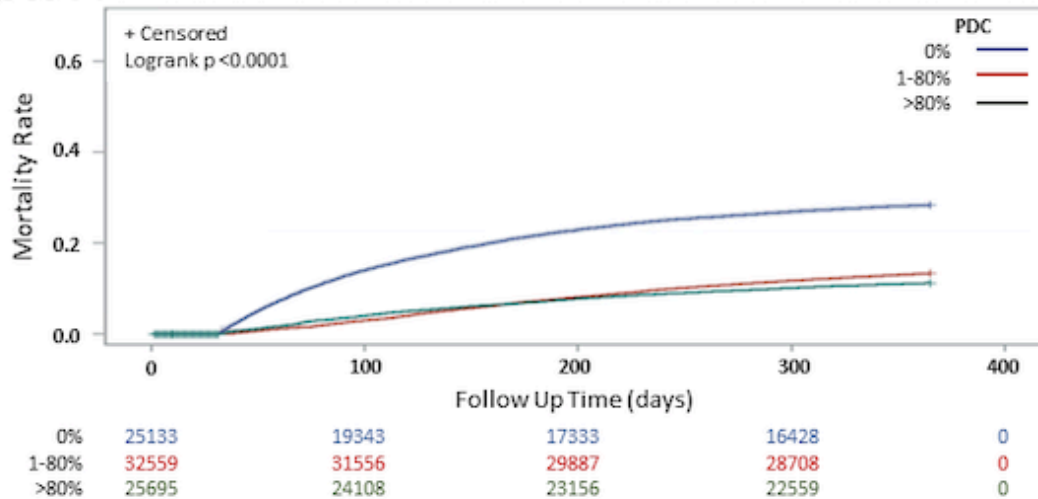

### B) Age 75-85

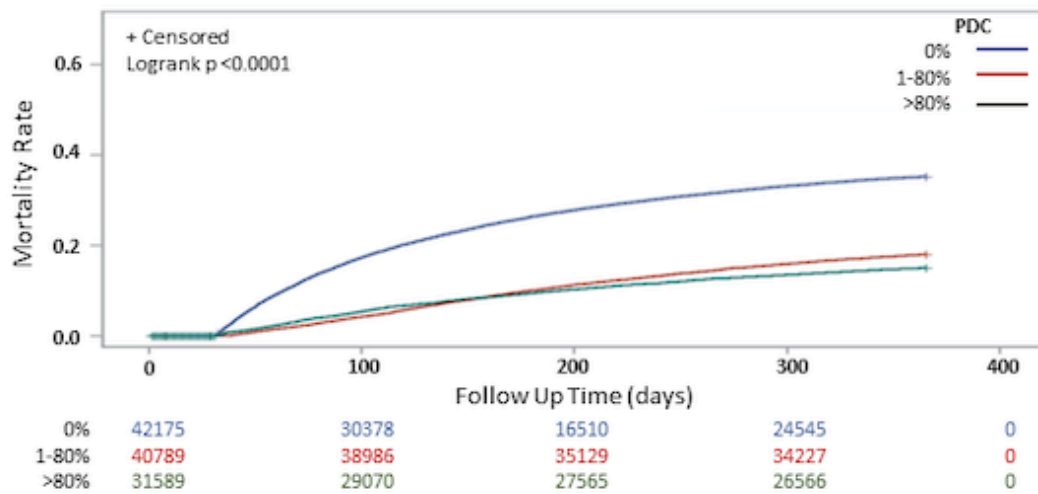

### C) Age 85+

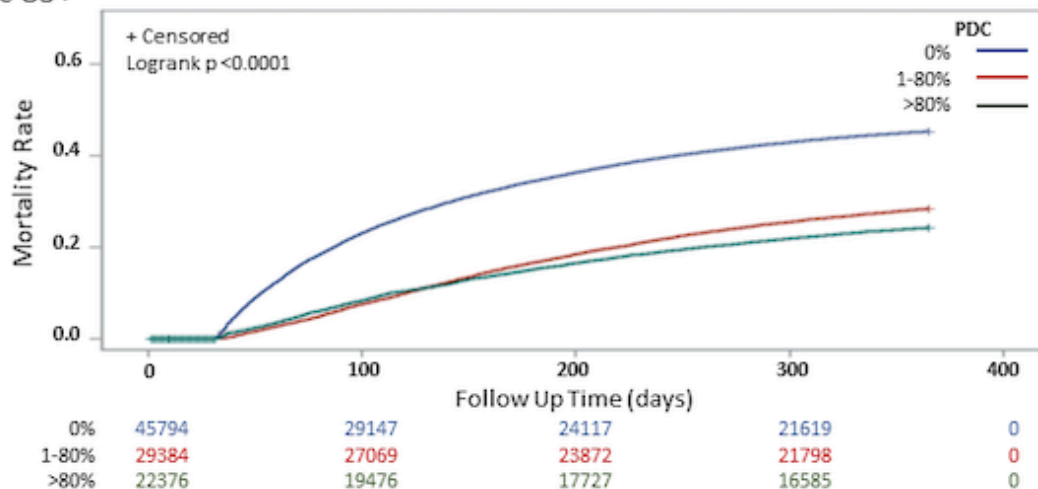

This figure shows the survival curves for beneficiaries based on exposure to ACEi/ARB/ARNI after admission for decompensated heart failure. (A) shows the survival curves for beneficiaries aged 66-74. (B) shows the survival curves for beneficiaries aged 75-85 and (C) shows the survival curves for beneficiaries aged 85+. In each panel, patients are stratified based on the proportion of days covered (PDC) by ACEi/ARB/ARNI: “no exposure” 0 PDC (blue), “moderate” exposure 1-80 PDC (red) and “high exposure” 80+ PDC (green).
